# Supplementary material for: Tunable Electromagnetic and Microwave Absorption Properties of Magnetic FeNi3 Alloys
Source: MDPI journal article supplement (doi:10.3390/nano13050930), 2023-03-03
Supplement: s1 [file s1]

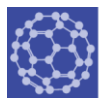

Supplementary Materials

# Tunable Electromagnetic and Microwave Absorption Properties of Magnetic FeNi<sub>3</sub> Alloys

Yu Zheng, Mei Wu, Congyi Qian, Yuxin Jin, Wei Xiao and Xiaohui Liang \*

Hangzhou Dianzi University, Hangzhou 310018, China

\* Correspondence: xhliang@hdu.edu.cn

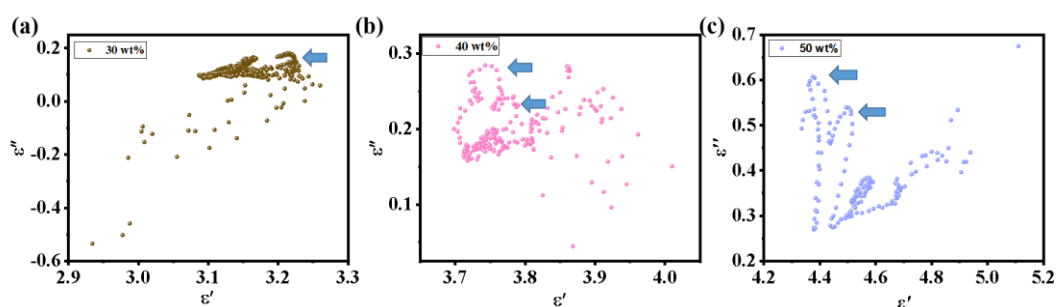Figure S1. Cole-Cole curves of FeNi<sub>3</sub> alloys with 30-50 wt% filling ratios.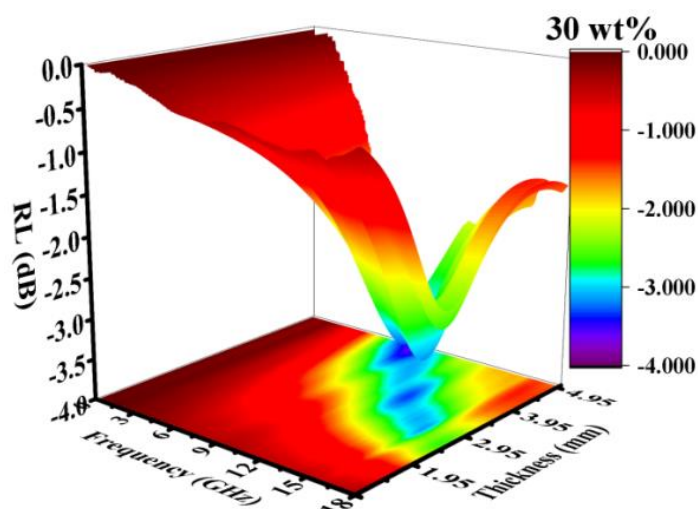Figure S2. RL values with a 30 wt% filling ratio of FeNi<sub>3</sub> alloy.

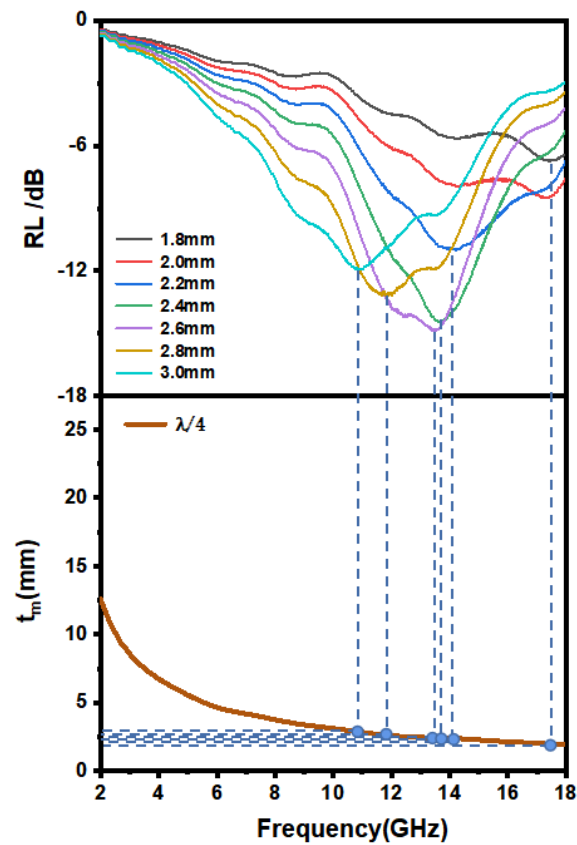

Figure S3. Comparison of various absorber thicknesses ( $t_m$ ) at the frequency for FeNi<sub>3</sub> alloys with 60 wt% mass ratios sample in  $\lambda/4$  conditions of maximum RL values ( $f_m$ ).

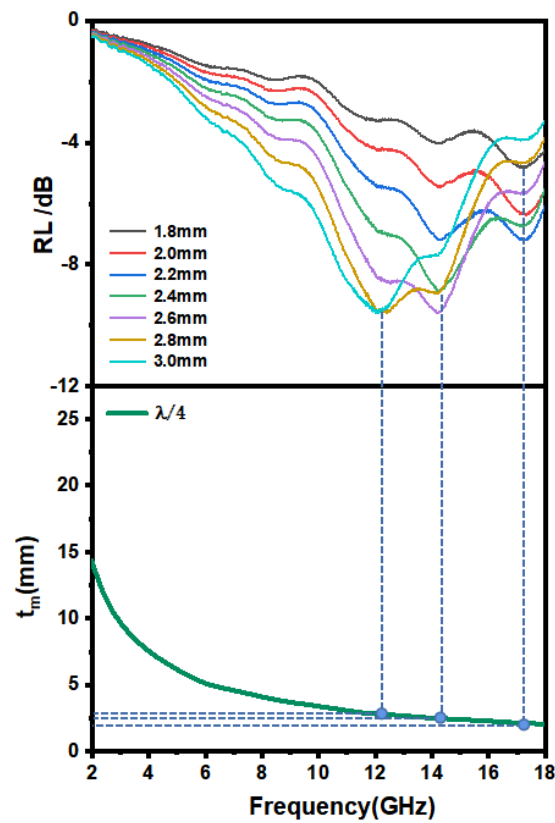

**Figure S4.** Comparison of various absorbent thicknesses ( $t_m$ ) at the frequency for FeNi<sub>3</sub> alloys with 50 wt% mass ratios sample in  $\lambda/4$  conditions of maximum RL values ( $f_m$ ).

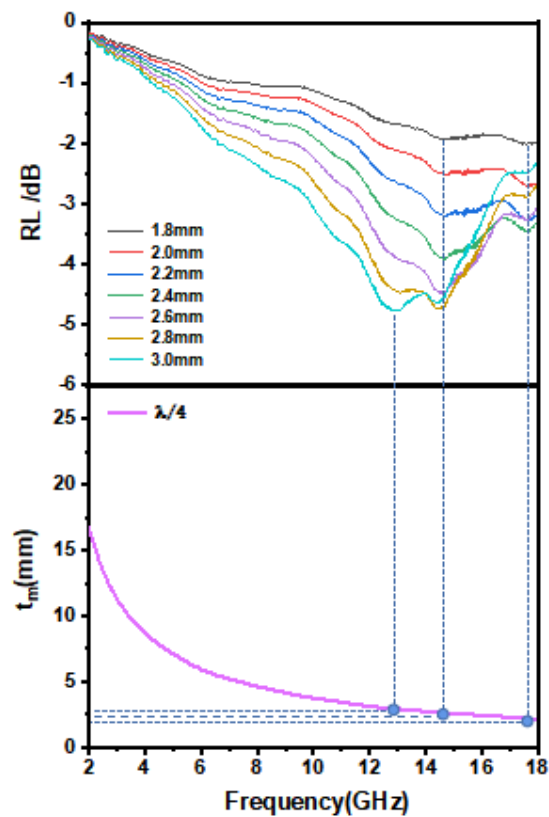

**Figure S5.** Comparison of various absorbent thicknesses ( $t_m$ ) at the frequency for FeNi<sub>3</sub> alloys with 40 wt% mass ratios sample in  $\lambda/4$  conditions of maximum RL values ( $f_m$ ).

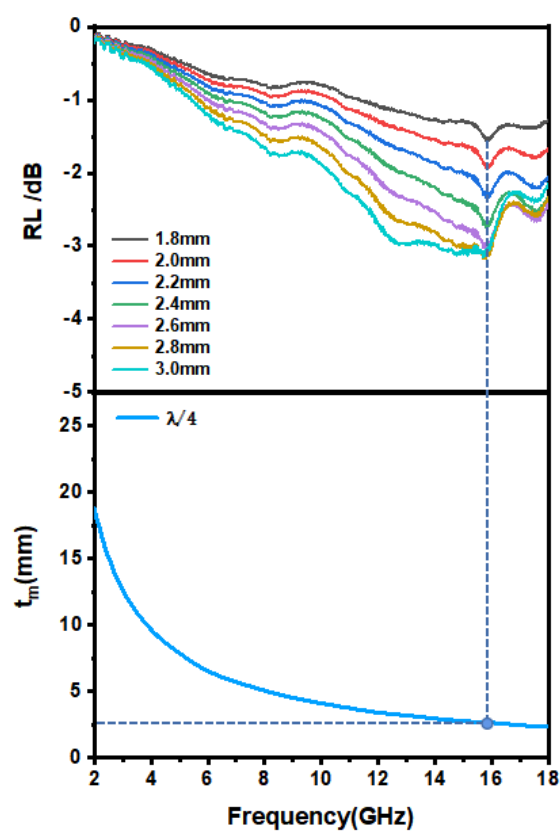

**Figure S6.** Comparison of various absorbent thicknesses ( $t_m$ ) at the frequency for FeNi<sub>3</sub> alloys with 30 wt% mass ratios sample in  $\lambda/4$  conditions of maximum RL values ( $f_m$ ).
